# Supplementary material for: An Aerosol Climatology via Remote Sensing over Metro Manila, Philippines
Source: Copernicus journal article supplement (doi:10.5194/egusphere-2023-197), 2023-03-27
Supplement: Supplementary file 1 [file egusphere-2023-197-supplement.pdf]

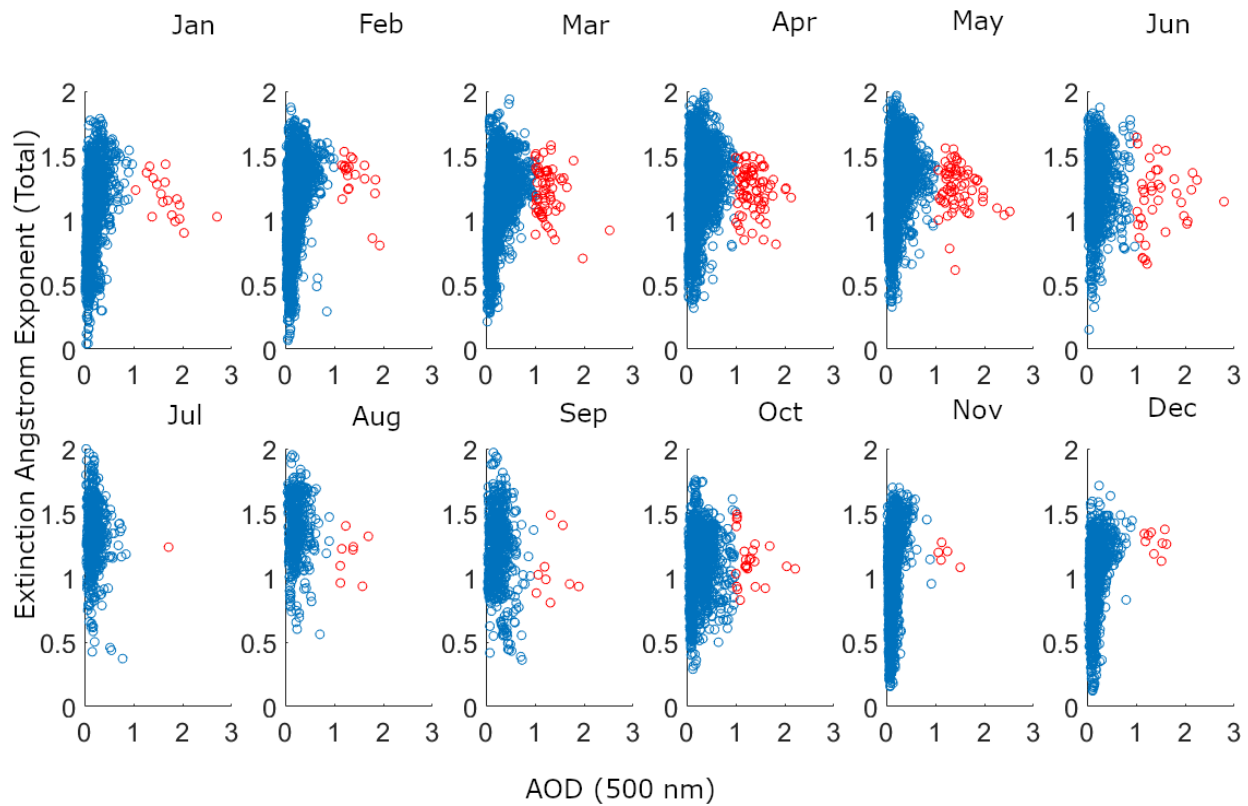

1  
 2 **Figure S1:** Scatterplots of total extinction angstrom exponent (EAE) versus aerosol optical depth  
 3 (AOD, 500 nm). The red circles indicate when AOD exceeded 1.

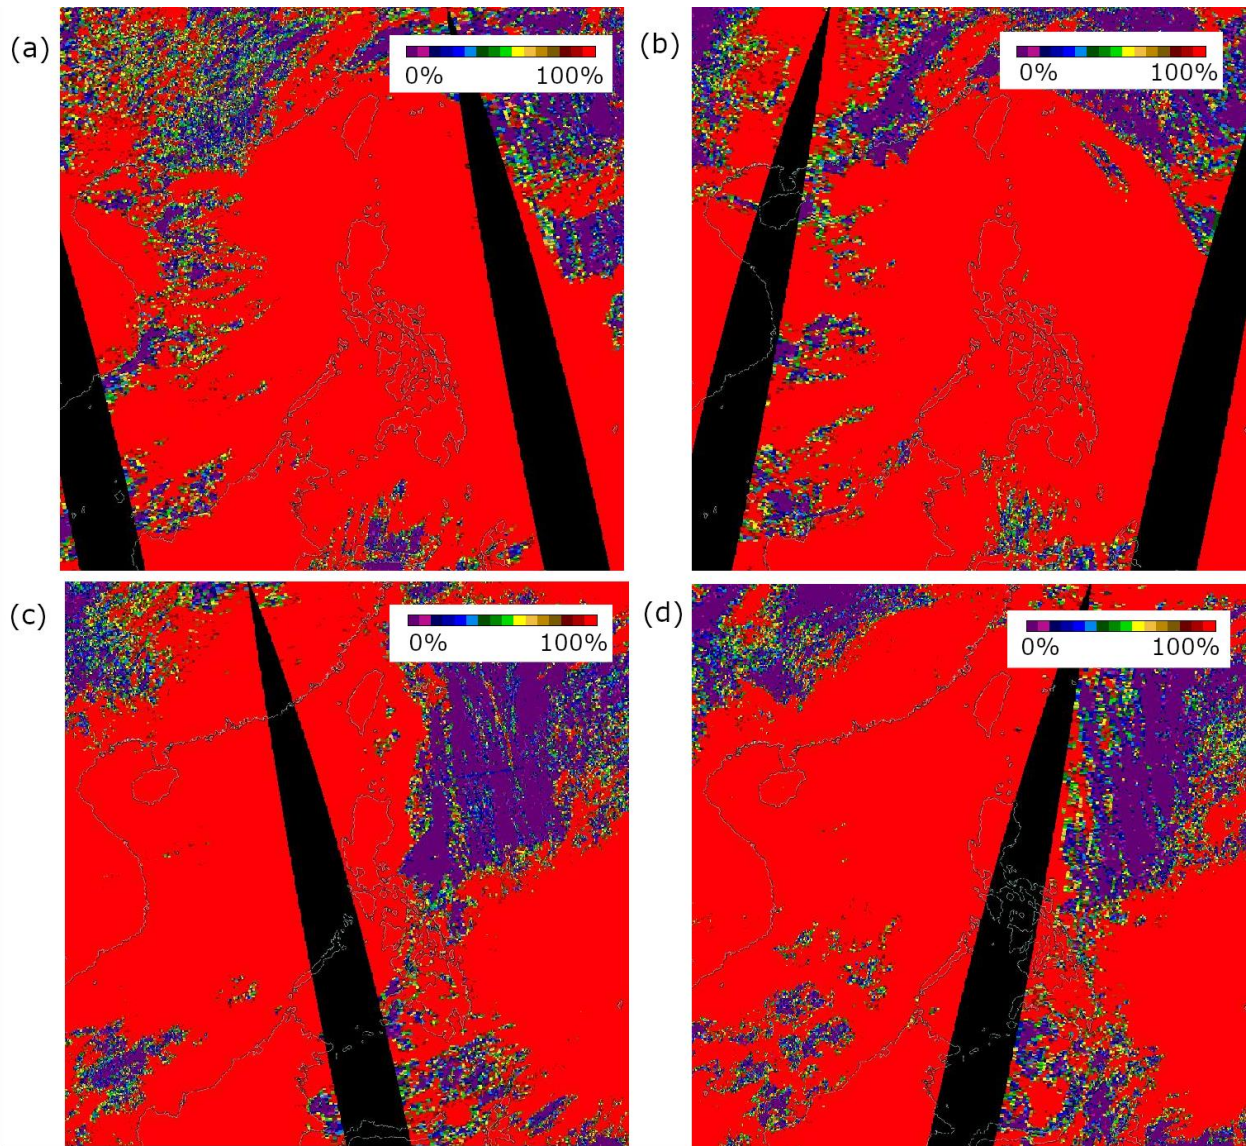

4

5 **Figure S2:** Cloud fraction images from (a/c) Aqua / MODIS and (b/d) Terra / MODIS satellite  
 6 products. These are day-time snapshots during the back-trajectory periods: (a/b) 24 August 2009  
 7 at 00:00 UTC and (c/d) 25 August 2009 at 00:00 UTC. Red areas in panels show where there is  
 8 100% cloud fraction.

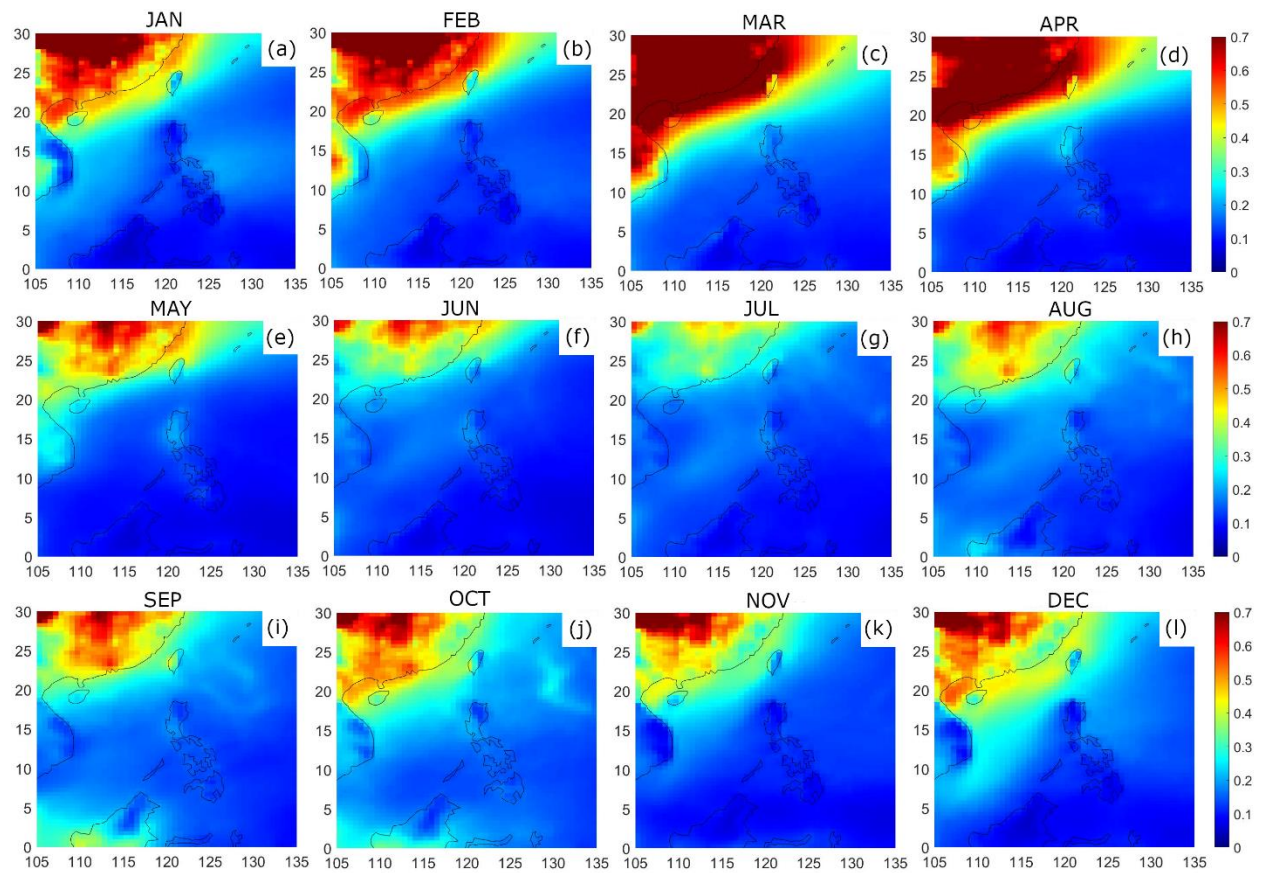

9  
 10 **Figure S3:** Monthly mean MERRA-2 aerosol optical depth (extinction at 550 nm) from 2009 to  
 11 2018 in Southeast Asia.

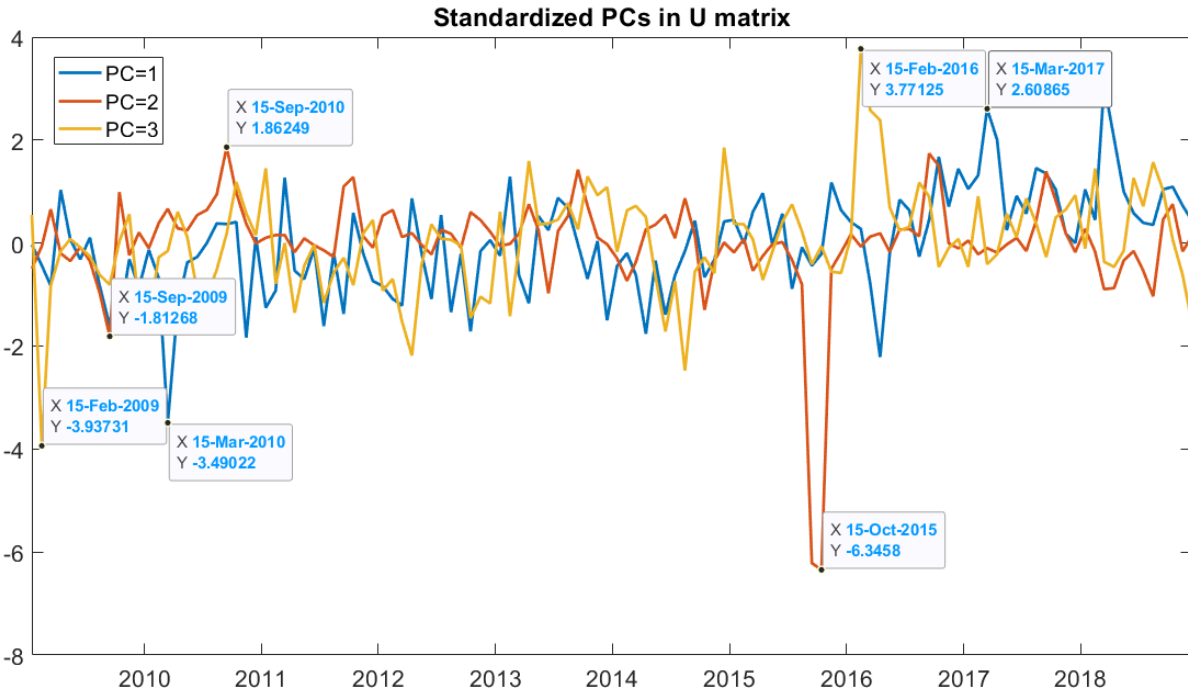

12  
13  
14

**Figure S4:** Time series of standardized principal components. Maximum and minimum values per principal component are annotated with the month of occurrence.
